# Supplementary material for: Proposed practical protocol for flow cytometry analysis of microglia from the healthy adult mouse brain: Systematic review and isolation methods’ evaluation
Source: Front Cell Neurosci. 2022 Oct 19;16:1017976. doi: 10.3389/fncel.2022.1017976 (PMC9626753; doi:10.3389/fncel.2022.1017976)
Supplement: Supplementary file 1 [file Table_1.XLSX]

## Sheet: Sheet1
Publication title	Author	Publication year	Animals		Microglia isolation		Flow cytometry specifications
			SEX	Age	Myelin removal method	Digestion enzyme(s)	Viability dye	Markers used for identification of cell subsets
TREM2 Regulates Microglial Cholesterol Metabolism upon Chronic Phagocytic Challenge	Alicia A.	2020	M and F	9-11 months	No demyelinization	Adult brain dissociation kit	Fixable Viability Stain BV510	NA
Dissociation of neonatal and adult mice brain for simultaneous analysis of microglia, astrocytes and infiltrating lymphocytes by flow cytometry	Calvo B.	2020	NA	4-6 months	Percoll (30%, and 30%-70%)	DNAse I with papain	DAPI	CD206, CD38
Tmem119-EGFP and Tmem119-CreERT2 Transgenic Mice for Labeling and Manipulating Microglia	Kaiser T.	2019	M and F	NA	Percoll (40%)	DNAse I	Live/dead violet	NA
Single-cell transcriptomics reveals distinct inflammation-induced microglia signatures	Sousa C.	2018	M and F	3-4 months	Myelin Removal Kit	NA	Hoechst, Sytox Red	NA
Analysis of Microglia and Monocyte-derived Macrophages from the Central Nervous System by Flow Cytometry	Martin E.	2017	NA	NA	Percoll (30%, 70%)	Liberase TL Research Grade	Fixable dead cell stain kit	Tmem119, CX3CR1, and CCR2
A new genetic strategy for targeting microglia in development and disease	McKinsey G.	2020	NA	adult	Percoll (30%, 70%)	NA	NA	TdTomato
ST2/IL-33-Dependent Microglial Response Limits Acute Ischemic Brain Injury	Yang Y.	2017	M and F	2-3 months	Percoll (30%, 70%)	Neural Tissue Dissociation Kit	NA	ST2, GLAST
Methodological comparison of FACS and MACS isolation of enriched microglia and astrocytes from mouse brain	Pan J.	2020	M	NA	Percoll (40%)	Adult brain dissociation kit	7AAD	ACSA2
Delayed microglial depletion after spinal cord injury reduces chronic inflammation and neurodegeneration in the brain and improves neurological recovery in male mice	Li Y.	2020	M	10-12 weeks	No demyelinization	Colagenase/dispase, papain, DNAse I	Zombie Aqua fixable viability dye	NA
Microglia and macrophages differ in their inflammatory profile after permanent brain ischemia	Zarruk J.	2018	M	2-3 months	No demyelinization	NA	eFluor 780	Ly6G, LysM-EGFP, TNF-alpha
Microglial IRF5-IRF4 regulatory axis regulates neuroinflammation after cerebral ischemia and impacts stroke outcomes	Mamun A.	2020	M	2-3 months	No demyelinization	Collagenase/dispase, DNAse I	Carboxylic acid succinimidyl ester (CASE)	Ly6C, Ly6G, MHCII, CD206, TNFα, IL-1β, IL-10, IL-4
Dopamine receptor D3 signalling in astrocytes promotes neuroinflammation	Montoya A.	2019	M	3 months	No demyelinization	Colagenase IV, DNAse	Zombie Aqua fixable viability dye	astrocytic GFAP, iNOS; arginase-1; CD16/32, CD206
Neuroprotective and neuro-rehabilitative effects of acute purinergic receptor P2X4 (P2X4R) blockade after ischemic stroke	Srivastava P.	2020	M and F	2-3 months	Percoll (30%, 70%)	NA	Carboxylic acid succinimidyl ester (CASE)	Ly6C, Ly6G P2X4R, CX3CRI
Anti-inflammatory and immunomodulatory mechanisms of atorvastatin in a murine model of traumatic brain injury	Xu X.	2017	M	6-8 weeks	Percoll (30%, 70%)	NA	NA	Ly6G, CD3, CD45R, CD206, NK1.1, CD86, B220
FGF21 alleviates neuroinflammation following ischemic stroke by modulating the temporal and spatial dynamics of microglia/macrophages	Wang D.	2020	NA	adult	No demyelinization	Neural Tissue Dissociation Kits	NA	CD3, CD8, CD4, F4/80, NK1.1, Ly6G, Ly6C, CD206, CD68, CD86
Microglia depletion increase brain injury after acute ischemic stroke in aged mice	Lee S.	2021	M	2-3 months, 18-19 months	Percoll (30%, 70%)	Collagenase/dispase, DNAse I	Live/dead discrimination stain	Ly6C, and Ly6G
Detection of Synaptic Proteins in Microglia by Flow Cytometry	Brioschi S.	2020	M and F	2 months	Percoll (30%)	NA	Not specified	VGLUT1
Potential caveats of putative microglia-specific markers for assessment of age-related cerebrovascular neuroinflammation	Honarpisheh P.	2020	M	1-3, 2-4, 12-15, 16-22 months	Percoll (30%, 70%)	Collagenase/dispase, DNAse I	Zombie Aqua fixable viability dye	Ly6C, TMEM119, P2RY12, MHCII
Genome-wide transcriptomic analysis of microglia reveals impaired responses in aged mice after cerebral ischemia	Shi L.	2020	M	10 weeks, 18 months	Percoll (30%, 70%)	Neural Tissue Dissociation Kit	NA	Ly6G, CD11c, Ly6C, CD3, CD4, CD8
Simultaneous Flow Cytometric Characterization of Multiple Cell Types Retrieved from Mouse Brain/Spinal Cord Through Different Homogenization Methods	Estevez F.	2019	M	2 months	Percoll (30%)	Neural tissue dissociation kit	7AAD	CD31, ACSA2, O4, CD90.2
Tenascin-C preserves microglia surveillance and restricts leukocyte and, more specifically, T cell infiltration of the ischemic brain	Manrique-Castano D.	2021	M	2-3 months	Percoll (37%)	NA	Trypan blue	CD3, CD19, CD8, Ly6G and Ly6C
One Brain-All Cells: A Comprehensive Protocol to Isolate All Principal CNS-Resident Cell Types from Brain and Spinal Cord of Adult Healthy and EAE Mice	Schroeter C.	2021	F	10-12 weeks	Adult Brain Dissociation Kit	Adult Brain Dissociation Kit	NA	O4, ACSA-2
Temporal profiling of Kv1.3 channel expression in brain mononuclear phagocytes following ischemic stroke	Gao T.	2019	M	2-3 months	Percoll (35%, 70%)	NA	NA	Ly6c, ShK-F6CA
IL-2mAb reduces demyelination after focal cerebral ischemia by suppressing CD8 + T cells	Zhou Y.	2018	M	8-10 weeks	Percoll gradient	Neural Tissue Dissociation Kit	NA	CD3, CD4, CD8, CD25, CD44, CD62L, foxp3, NK1.1, Gr1,
Interleukin-10 improves stroke outcome by controlling the detrimental Interleukin-17A response	Piepke M.	2021	M	10-18 weeks	Percoll	Collagenase, DNAse I	NA	B220, CD3, 17A2, NK1.1, TCR-γδ, CD4, CD8, CD49b, MHC II, Ly6g, F4/80, Lag-3, PD-1, IFN-γ, CD210, CD19, CD11c, TIGIT, IL-17A, RORγT
miR-221 Exerts Neuroprotective Effects in Ischemic Stroke by Inhibiting the Proinflammatory Response	Shan Y.	2021	M	2 months	Percoll (30%, 70%)	NA	NA	CD11c, CD3, CD8
Deletion of the P2X4 receptor is neuroprotective acutely, but induces a depressive phenotype during recovery from ischemic stroke	Verma R.	2017	M and F	NA	NA	NA	NA	Ly6C
Peripheral immune cells infiltrate into sites of secondary neurodegeneration after ischemic stroke	Jones K.	2018	M	10 weeks	Percoll (35%)	NA	Sytox blue	Cx3cr1, CD11c, Ly6G, Ly6C, CD4, CD8, B220
CD200-CD200R1 inhibitory signaling prevents spontaneous bacterial infection and promotes resolution of neuroinflammation and recovery after stroke	Ritzel R.	2019	M	12-14 weeks	Percoll (30%, 70%)	Collagenase/dispase, DNAse I	Carboxylic acid succinimidyl ester (CASE)	CD3, Ly6C, Ly6G
Interferon regulatory factor 4/5 signaling impacts on microglial activation after ischemic stroke in mice	Mamun A.	2018	M	2-3 months	Percoll (30%, 70%)	Collagenase/dispase, DNAse I	Carboxylic acid succinimidyl ester (CASE)	Ly6C, Ly6G, MHC-II, CD206
Post-stroke DHA Treatment Protects Against Acute Ischemic Brain Injury by Skewing Macrophage Polarity Toward the M2 Phenotype	Cai W.	2018	M and F	2-3 months	Percoll (30%, 70%)	Trypsin	NA	Ly6G, CD3, CD19, CD206, CD16
Determining the effect of aging, recovery time, and post-stroke memantine treatment on delayed thalamic gliosis after cortical infarct	Seok G.	2021	M	11-14, 18-22 weeks	Cell debris removal kit	Collagenase/dispase, DNAse I	Fixable Aqua Dead Cell Stain Kit	NA
